# Supplementary material for: Constructing molecular bridge for high-efficiency and stable perovskite solar cells based on P3HT
Source: PubMed Central journal article supplement (PMC9672063; doi:10.1038/s41467-022-34768-7), 2022-11-17
Supplement: 41467_2022_34768_MOESM3_ESM.pdf [file 41467_2022_34768_MOESM3_ESM.pdf]

## Solar Cells Reporting Summary

Nature Research wishes to improve the reproducibility of the work that we publish. This form is intended for publication with all accepted papers reporting the characterization of photovoltaic devices and provides structure for consistency and transparency in reporting. Some list items might not apply to an individual manuscript, but all fields must be completed for clarity.

For further information on Nature Research policies, including our [data availability policy](#), see [Authors & Referees](#).

### ► Experimental design

#### Please check: are the following details reported in the manuscript?

##### 1. Dimensions

- Area of the tested solar cells  Yes  No The device area is 0.125 cm<sup>2</sup>
- Method used to determine the device area  Yes  No Metal mask of 0.125 cm<sup>2</sup> is used during metal electrode fabrication.

##### 2. Current-voltage characterization

- Current density-voltage (J-V) plots in both forward and backward direction  Yes  No The plots are provided in the manuscript.
- Voltage scan conditions  Yes  No The scanning speed is 100 mV/s and the bias ranges is from -0.2 V to 1.2 V under reverse and forward voltage scan.  
*For instance: scan direction, speed, dwell times*
- Test environment  Yes  No All J-V results are measured in a nitrogen-filled glovebox.  
*For instance: characterization temperature, in air or in glove box*
- Protocol for preconditioning of the device before its characterization  Yes  No No preconditioning is used in this work.
- Stability of the J-V characteristic  Yes  No Stabilized PCEs of solar cells are provided.  
*Verified with time evolution of the maximum power point or with the photocurrent at maximum power point; see ref. 7 for details.*

##### 3. Hysteresis or any other unusual behaviour

- Description of the unusual behaviour observed during the characterization  Yes  No Very minor (2.6%) hysteresis is observed for devices.
- Related experimental data  Yes  No J-V curves under reverse and forward scans are provided.

##### 4. Efficiency

- External quantum efficiency (EQE) or incident photons to current efficiency (IPCE)  Yes  No EQE curves are provided.
- A comparison between the integrated response under the standard reference spectrum and the response measure under the simulator  Yes  No The steady-state PCE values from EQE are compared to PCE values from J-V measurements, with ~ 0.6% difference.
- For tandem solar cells, the bias illumination and bias voltage used for each subcell  Yes  No Tandem solar cells are not covered in this paper.

##### 5. Calibration

- Light source and reference cell or sensor used for the characterization  Yes  No The J-V characteristics of the devices were measured with a Keithley 2440 source under a simulated AM1.5G spectrum. With a solar simulator (Newport, 91160), the light intensity was calibrated using a standard silicon solar cell device by the NREL.
- Confirmation that the reference cell was calibrated and certified  Yes  No The reference cells are calibrated and certified.

- Calculation of spectral mismatch between the reference cell and the devices under test  
 Yes  
 No  
 The light spectrum used for measurements matches well with the reference silicon cell, we do not calculated the spectral mismatch between the reference cell and the tested cells.
6. Mask/aperture
- Size of the mask/aperture used during testing  
 Yes  
 No  
 Metal aperture mask with area of 0.07 cm<sup>2</sup> is used for testing.
- Variation of the measured short-circuit current density with the mask/aperture area  
 Yes  
 No  
 All J-V curves are measured with mask.
7. Performance certification
- Identity of the independent certification laboratory that confirmed the photovoltaic performance  
 Yes  
 No  
 Solar cell efficiency is not certified.
- A copy of any certificate(s)  
*Provide in Supplementary Information*  
 Yes  
 No  
 No certificate(s).
8. Statistics
- Number of solar cells tested  
 Yes  
 No  
 This have been stated in the manuscript.
- Statistical analysis of the device performance  
 Yes  
 No  
 This have been stated in the manuscript.
9. Long-term stability analysis
- Type of analysis, bias conditions and environmental conditions  
*For instance: illumination type, temperature, atmosphere humidity, encapsulation method, preconditioning temperature*  
 Yes  
 No  
 This have been stated in the manuscript.
